# Supplementary material for: Feasibility of Point-of-Care Testing for Influenza Within a National Primary Care Sentinel Surveillance Network in England: Protocol for a Mixed Methods Study
Source: PubMed Central journal article supplement (PMC6878097; doi:10.2196/14186), 2019-11-11
Supplement: resprot_v8i11e14186_app1.pdf [file resprot_v8i11e14186_app1.pdf]

## Appendix 1 - Point of Care Test for Influenza – implementation checklist

| Relevant implementation questions to consider from PHE[13]                                                                                                                                                                                                                                                                                                                                                                                           | Relevant implementation questions to consider for a sentinel surveillance network                                                                                                                                                                                                       | Relevant implementation questions to consider for primary care practices                                                                                                                                                                                                                                                                                                                                                                                                                                           |
|------------------------------------------------------------------------------------------------------------------------------------------------------------------------------------------------------------------------------------------------------------------------------------------------------------------------------------------------------------------------------------------------------------------------------------------------------|-----------------------------------------------------------------------------------------------------------------------------------------------------------------------------------------------------------------------------------------------------------------------------------------|--------------------------------------------------------------------------------------------------------------------------------------------------------------------------------------------------------------------------------------------------------------------------------------------------------------------------------------------------------------------------------------------------------------------------------------------------------------------------------------------------------------------|
| <b>Performance of the POCT platform</b>                                                                                                                                                                                                                                                                                                                                                                                                              |                                                                                                                                                                                                                                                                                         |                                                                                                                                                                                                                                                                                                                                                                                                                                                                                                                    |
| <ul style="list-style-type: none"> <li>○ Which platform chosen</li> <li>○ Rationale for choice</li> <li>○ Location of platform</li> <li>○ Test operator</li> </ul>                                                                                                                                                                                                                                                                                   | <ul style="list-style-type: none"> <li>○ Which platform chosen</li> <li>○ Rationale for choice</li> </ul>                                                                                                                                                                               | <ul style="list-style-type: none"> <li>○ Location of POCT</li> <li>○ Test operator</li> </ul>                                                                                                                                                                                                                                                                                                                                                                                                                      |
| <b>Clinical pathways and training</b>                                                                                                                                                                                                                                                                                                                                                                                                                |                                                                                                                                                                                                                                                                                         |                                                                                                                                                                                                                                                                                                                                                                                                                                                                                                                    |
| <ul style="list-style-type: none"> <li>○ Clinical algorithm provided</li> <li>○ Method used to disseminate algorithm</li> <li>○ How will a test be ordered – including patient consent</li> <li>○ Who will train staff to use POCT</li> <li>○ How will they be assessed</li> <li>○ Who is responsible for training and maintaining competency</li> <li>○ Will you appoint a POCT team</li> <li>○ When will the roll out of training begin</li> </ul> | <ul style="list-style-type: none"> <li>○ Who will train practices to use POCT</li> <li>○ How will practices be assessed</li> <li>○ Who is responsible for training and maintaining competency of practices</li> <li>○ When will the roll out of training begin for practices</li> </ul> | <ul style="list-style-type: none"> <li>○ Clinical algorithm provided</li> <li>○ Method used to disseminate algorithm to clinical staff</li> <li>○ How will a test be ordered – including patient consent</li> <li>○ Who will train practice staff to use POCT</li> <li>○ How will practice staff be assessed</li> <li>○ Who is responsible for training and maintaining competency</li> <li>○ Will practices appoint a POCT team</li> <li>○ When will the roll out of training begin for practice staff</li> </ul> |
| <b>Result reporting</b>                                                                                                                                                                                                                                                                                                                                                                                                                              |                                                                                                                                                                                                                                                                                         |                                                                                                                                                                                                                                                                                                                                                                                                                                                                                                                    |
| <ul style="list-style-type: none"> <li>○ Where is result reported for real time action</li> </ul>                                                                                                                                                                                                                                                                                                                                                    | <ul style="list-style-type: none"> <li>○ Is data from POCT integrated into the sentinel surveillance</li> </ul>                                                                                                                                                                         | <ul style="list-style-type: none"> <li>○ Where is result reported for real time clinical actions</li> </ul>                                                                                                                                                                                                                                                                                                                                                                                                        |

|                                                                                                                                                                                                                                                                                                                                                                                      |                                                                                                                                                                                                                                           |                                                                                                                                                                                                                                                                                                                                                                                      |
|--------------------------------------------------------------------------------------------------------------------------------------------------------------------------------------------------------------------------------------------------------------------------------------------------------------------------------------------------------------------------------------|-------------------------------------------------------------------------------------------------------------------------------------------------------------------------------------------------------------------------------------------|--------------------------------------------------------------------------------------------------------------------------------------------------------------------------------------------------------------------------------------------------------------------------------------------------------------------------------------------------------------------------------------|
| <ul style="list-style-type: none"> <li>○ Is it integrated into the medical record – if not how is the result available to clinicians</li> <li>○ Does the result link to clinical protocols for management of flu</li> <li>○ How are results flagged to the infection control team</li> <li>○ How does this affect patient workflow in real time (isolation and cohorting)</li> </ul> | <p>system and available for public health analysis</p>                                                                                                                                                                                    | <ul style="list-style-type: none"> <li>○ Is it integrated into the medical record – if not how is the result available to clinicians</li> <li>○ Does the result link to clinical protocols for management of flu</li> <li>○ How are results flagged to the infection control team</li> <li>○ How does this affect patient workflow in real time (isolation and cohorting)</li> </ul> |
| <b>Clinical governance</b>                                                                                                                                                                                                                                                                                                                                                           |                                                                                                                                                                                                                                           |                                                                                                                                                                                                                                                                                                                                                                                      |
| <ul style="list-style-type: none"> <li>○ Who is responsible for the POCT machine</li> <li>○ Is there a clear line of accountability for any issue</li> <li>○ Who is responsible for stock supply</li> <li>○ Do you intent to do lab/ clinical verification of POCT results</li> <li>○ Quality assurance considerations</li> </ul>                                                    | <ul style="list-style-type: none"> <li>○ Is there a lead contact for POCT within the sentinel surveillance network</li> <li>○ Do you intent to do lab verification of POCT results</li> <li>○ Quality assurance considerations</li> </ul> | <ul style="list-style-type: none"> <li>○ Who is responsible for the POCT machine</li> <li>○ Is there a clear line of accountability for any issue</li> <li>○ Who is responsible for stock supply</li> <li>○ Do you intent to do lab/ clinical verification of POCT results</li> <li>○ Quality assurance considerations</li> </ul>                                                    |
| <b>Costs</b>                                                                                                                                                                                                                                                                                                                                                                         |                                                                                                                                                                                                                                           |                                                                                                                                                                                                                                                                                                                                                                                      |
| <ul style="list-style-type: none"> <li>○ Estimated number of test over the winter period</li> <li>○ Estimate cost per test, initial costs for the platform</li> <li>○ Estimated savings</li> </ul>                                                                                                                                                                                   | <ul style="list-style-type: none"> <li>○ Estimated number of test over the winter period</li> <li>○ Estimate cost per test, initial costs for the platform</li> </ul>                                                                     | <ul style="list-style-type: none"> <li>○ Estimated savings</li> </ul>                                                                                                                                                                                                                                                                                                                |
| <b>Monitoring of effectiveness</b>                                                                                                                                                                                                                                                                                                                                                   |                                                                                                                                                                                                                                           |                                                                                                                                                                                                                                                                                                                                                                                      |

|                                                                                                                                                                                                                                                                                                                                                                       |                                                                                                                                                         |                                                                                                                                                                                                                                                                                                                                                                       |
|-----------------------------------------------------------------------------------------------------------------------------------------------------------------------------------------------------------------------------------------------------------------------------------------------------------------------------------------------------------------------|---------------------------------------------------------------------------------------------------------------------------------------------------------|-----------------------------------------------------------------------------------------------------------------------------------------------------------------------------------------------------------------------------------------------------------------------------------------------------------------------------------------------------------------------|
| <ul style="list-style-type: none"> <li>○ Components to be assessed (eg length of stay, proportion of NAI, treated patients with or without flu, proportion of flu positive patients given inappropriate antibiotics)?</li> <li>○ Where will the information be stored?</li> <li>○ When will this be reviewed?</li> <li>○ Who will be responsible for this?</li> </ul> | <ul style="list-style-type: none"> <li>○ When will information about effectiveness be reviewed?</li> <li>○ Who will be responsible for this?</li> </ul> | <ul style="list-style-type: none"> <li>○ Components to be assessed (eg length of stay, proportion of NAI, treated patients with or without flu, proportion of flu positive patients given inappropriate antibiotics)?</li> <li>○ Where will the information be stored?</li> <li>○ When will this be reviewed?</li> <li>○ Who will be responsible for this?</li> </ul> |
|-----------------------------------------------------------------------------------------------------------------------------------------------------------------------------------------------------------------------------------------------------------------------------------------------------------------------------------------------------------------------|---------------------------------------------------------------------------------------------------------------------------------------------------------|-----------------------------------------------------------------------------------------------------------------------------------------------------------------------------------------------------------------------------------------------------------------------------------------------------------------------------------------------------------------------|
