# Supplementary material for: Feasibility of Point-of-Care Testing for Influenza Within a National Primary Care Sentinel Surveillance Network in England: Protocol for a Mixed Methods Study
Source: PubMed Central journal article supplement (PMC6878097; doi:10.2196/14186), 2019-11-11
Supplement: resprot_v8i11e14186_app2.pdf [file resprot_v8i11e14186_app2.pdf]

## Appendix 2 – Semi-structured questionnaire for primary care staff

- Performance of the POCT platform
- Location of POCT
- Who was the POCT operator
- Clinical pathways and training
- Was a clinical algorithm created that included the POCT?
- Method used to disseminate algorithm to practice staff?
- How was a test ordered (including how was patient consent obtained)?
- Who trained practice staff to use POCT?
- How were practice staff assessed?
- Who was responsible for training and maintaining competency of practice staff?
- Did practices appoint a POCT team?
- When will the roll out of training begin for practice staff?
- Result reporting
- Where were POCT result reported for real time clinical actions?
- Were the POCT results integrated into the medical record – if not how were the result available to clinicians?
- Did the POCT result link to clinical protocols for management of flu?
- How were POCT results flagged to the infection control team?
- How did access to POCT results affect patient workflow in real time (isolation and cohorting)?
- Clinical governance
- Who was responsible for the POCT machine?
- Was there a clear line of accountability for any issues with the POCT?
- Who was responsible for stock supply?
- Was there any intent to do clinical verification of the POCT result?
- Was any quality assurance of POCT machines undertaken?

- Costs
- Estimated savings
  - Monitoring of effectiveness
  - Were any of the following patient outcomes monitored (eg length of stay, proportion of NAI, treated patients with or without flu, proportion of flu positive patients given inappropriate antibiotics)?
  - Where was this information stored?
  - When was this reviewed?
  - Who was responsible for this monitoring?
